# Supplementary material for: NPM and NPM-MLF1 interact with chromatin remodeling complexes and influence their recruitment to specific genes
Source: PLoS Genet. 2019 Nov 1;15(11):e1008463. doi: 10.1371/journal.pgen.1008463 (PMC6853375; doi:10.1371/journal.pgen.1008463)
Supplement: S4 File — (XLSX) [file pgen.1008463.s019.xlsx]

## Sheet: Downregulated genes
Downregulated genes
Gene	Target	Sh Scramble Mean	Sh NPM Mean	Fold change
MS4A4A	AMPL34733790	123.514	1.738	-6.1511
ZNF557	AMPL4982980	6.283	0.102	-5.94481
MS4A6A	AMPL35316992	3.0275	0.0563333	-5.74799
SMARCAD1	AMPL4693281	6.8495	0.138	-5.63326
APBB1IP	AMPL30801646	1.7825	0.063	-4.82241
ITGA4	AMPL2794417	4.013	0.147333	-4.76753
SIRPA	AMPL18328583	8.5065	0.331	-4.68366
MS4A3	AMPL28581557	36.6085	1.50267	-4.60658
EPX	AMPL5336932	1.4285	0.063	-4.50301
DFNA5	AMPL4277522	14.329	0.774	-4.21046
GGT5	AMPL3116145	25.3115	1.416	-4.1599
CD7	AMPL29731993	19.8085	1.114	-4.1523
PLSCR4	AMPL31697547	3.009	0.201	-3.90402
TEX19	AMPL21742628	19.717	1.382	-3.83461
CCDC162P	AMPL18798433	1.613	0.126333	-3.67444
GPR174	AMPL14082864	0.7985	0.0633333	-3.65626
INPP5D	AMPL26955322	36.8085	2.98633	-3.62359
STAP1	AMPL13070302	17.3185	1.407	-3.62162
ANKRD44	AMPL9177370	4.0445	0.334333	-3.5966
PLXNA2	AMPL14569623	15.7595	1.318	-3.5798
PLXNC1	AMPL28993506	3.697	0.314333	-3.55599
CEP170P1	AMPL20282436	1.3585	0.126667	-3.42291
SUMO1P1	AMPL19937732	1.5025	0.141667	-3.40679
CSPP1	AMPL14075130	9.1265	0.861333	-3.40542
PRG2	AMPL7050347	50.4835	4.93867	-3.35362
ACPP	AMPL5134608	1.43	0.144667	-3.30521
WAS	AMPL1943268	129.138	14.809	-3.12437
INPP5J	AMPL3292922	11.8615	1.361	-3.12355
NPY1R	AMPL5263206	0.486	0.0563333	-3.1089
SLITRK1	AMPL16109219	1.2155	0.141667	-3.10098
TANK	AMPL29056618	1.749	0.204333	-3.09753
LRMP	AMPL7121265	32.0855	3.75333	-3.09568
SLC52A3	AMPL16741812	0.535	0.063	-3.08612
PDLIM5	AMPL27399571	0.718	0.085	-3.07845
IL32	AMPL1098848	11.39	1.35867	-3.0675
S100A4	AMPL9652473	10.469	1.26633	-3.04739
PLOD2	AMPL22352457	26.9665	3.33767	-3.01426
TRANK1	AMPL25400028	70.584	8.74467	-3.01287
SH3BP2	AMPL5857629	12.424	1.65167	-2.91114
FAM120AOS	AMPL22538660	6.659	0.888667	-2.90559
SIGLEC10	AMPL16213662	2.807	0.376667	-2.89767
VCAN	AMPL27709723	0.633	0.085	-2.89667
SLC16A9	AMPL21485890	8.7535	1.23167	-2.82925
NEO1	AMPL9884054	12.7375	1.80167	-2.82168
SIGLEC11	AMPL17817914	1.895	0.274667	-2.78644
SOX13	AMPL27246965	0.3845	0.0563333	-2.77092
MASP1	AMPL34516195	0.6575	0.0983333	-2.74124
CORO1A	AMPL12128940	51.325	7.71633	-2.73367
TYROBP	AMPL21719431	34.614	5.21367	-2.73099
PCOLCE-AS1	AMPL37579463	0.305	0.046	-2.7291
ITGB2	AMPL1792984	4.814	0.727667	-2.72589
LIN28A	AMPL14431764	4.406	0.666667	-2.72443
SELPLG	AMPL10624717	32.483	5.01067	-2.69661
NKX3-2	AMPL10811303	3.464	0.545	-2.66811
SLCO4C1	AMPL18246971	13.4645	2.12233	-2.66544
RIN3	AMPL15550730	21.4185	3.433	-2.64132
ITGAM	AMPL3550541	13.98	2.25033	-2.63515
CFI	AMPL5895139	1.9235	0.31	-2.63339
FCGRT	AMPL28821449	1.3075	0.214333	-2.60888
FCGR1B	AMPL601158	1.5995	0.264	-2.59901
SIGLEC12	AMPL16944033	12.5805	2.14633	-2.55124
FAM49A	AMPL15147398	27.305	4.74567	-2.52448
LOC285547	AMPL38015038	1.831	0.320667	-2.51349
FLJ11235	AMPL19061752	0.2605	0.0456667	-2.51207
HDC	AMPL8733478	5.4735	0.983333	-2.47671
TRPC3	AMPL6324733	0.7205	0.13	-2.47049
SLC24A6	AMPL14236094	3.2115	0.591333	-2.4412
MYOZ1	AMPL35212143	0.305	0.0563333	-2.43675
GPR85	AMPL9290431	4.636	0.856667	-2.43607
PTPN6	AMPL17614363	13.8365	2.59967	-2.41208
ACTL8	AMPL15371795	17.4985	3.29	-2.41107
BMP6	AMPL10007442	1.2095	0.229	-2.40099
ROBO2	AMPL11235307	2.7015	0.513667	-2.39486
FARP1	AMPL28153341	0.2955	0.0563333	-2.3911
SMPD3	AMPL31300405	0.9165	0.175667	-2.38329
COL1A2	AMPL2120611	10.335	1.98833	-2.37791
NXF3	AMPL36685713	5.39	1.039	-2.37509
PRSS8	AMPL10013862	30.151	5.817	-2.37386
TSPAN32	AMPL35462951	12.935	2.49867	-2.37205
KRT86	AMPL11662450	0.6055	0.119333	-2.34313
DOCK10	AMPL25657488	1.2	0.239	-2.32795
AIF1	AMPL9337479	33.502	6.698	-2.32244
CHST3	AMPL30159281	0.225	0.0456667	-2.30071
TBC1D2B	AMPL36039852	1.59	0.324	-2.29496
GAGE13	AMPL3612413	2.202	0.461	-2.25598
CTSS	AMPL29536018	14.69	3.085	-2.25149
ACOT11	AMPL36466747	3.334	0.700667	-2.25045
DENND1C	AMPL14070763	1.4535	0.309667	-2.23074
RELN	AMPL15857584	55.3405	11.8247	-2.22654
DOCK2	AMPL27535684	152.108	32.5347	-2.22505
PURA	AMPL26880917	2.046	0.439667	-2.21832
ACP5	AMPL5351157	2.056	0.443667	-2.21229
DZIP1	AMPL20945715	2.083	0.449667	-2.21173
ZNF85	AMPL8942369	6.224	1.38367	-2.16935
ZNF853	AMPL33606721	1.651	0.367667	-2.16687
CITED1	AMPL5874751	0.362	0.081	-2.16
PER4	AMPL21002396	0.486	0.109	-2.15663
TBC1D10C	AMPL22282177	2.2	0.499667	-2.13847
KLF8	AMPL12572517	0.3755	0.0853333	-2.13763
MS4A2	AMPL4932710	0.446	0.102	-2.12847
CRB2	AMPL17904276	3.846	0.885667	-2.11852
IFITM2	AMPL29045834	185.923	43.077	-2.10971
RPL35A	AMPL5590031	119.038	27.6033	-2.10851
HEXIM2	AMPL35000659	2.196	0.514667	-2.09317
PRM3	AMPL36912973	0.345	0.081	-2.0906
HNRNPA3P1	AMPL20996576	2.315	0.545667	-2.08492
SLC16A3	AMPL8970841	12.289	2.91833	-2.07415
CA14	AMPL12497984	1.556	0.370667	-2.06965
MTCH1	AMPL24491710	5.3585	1.28667	-2.05819
ATAD3C	AMPL5771912	0.19	0.0456667	-2.05679
USP17L5	AMPL6843460	0.19	0.0456667	-2.05679
PRTN3	AMPL9031953	3.204	0.771333	-2.05445
ADAMTS9	AMPL21267509	1.9105	0.462	-2.04799
SLC30A3	AMPL9934533	11.808	2.857	-2.04719
TNFAIP8	AMPL25077854	0.19	0.046	-2.04629
TNFRSF14	AMPL28322825	0.19	0.046	-2.04629
IGFLR1	AMPL15291299	1.0315	0.250333	-2.04282
SYT10	AMPL22119301	1.609	0.390667	-2.04215
IL12RB2	AMPL10194892	2.54	0.617	-2.04149
CCDC103	AMPL21796011	3.026	0.735667	-2.04029
CILP2	AMPL18348099	1.473	0.359	-2.0367
TRAPPC11	AMPL35430981	6.6265	1.618	-2.03404
LOC284551	AMPL19262256	0.359	0.0876667	-2.03388
ANXA3	AMPL28112865	16.62	4.06033	-2.03325
TNFSF13B	AMPL13384029	0.906	0.222333	-2.02679
MXRA8	AMPL14251521	5.9435	1.46733	-2.01812
C11orf52	AMPL18637307	0.3265	0.0806667	-2.01704
RNASE6	AMPL29228095	0.6975	0.172667	-2.0142
PALD1	AMPL24162057	12.687	3.15633	-2.00703
BATF2	AMPL35884740	0.676	0.172	-1.97461
CACNA2D4	AMPL16644247	0.498	0.127333	-1.96754
FZD3	AMPL34869250	4.5	1.15167	-1.9662
LRRC25	AMPL36154487	3.025	0.775	-1.96467
TTC9C	AMPL17274391	1.7945	0.46	-1.96388
BAI3	AMPL7540943	12.743	3.28033	-1.95779
CFP	AMPL11260296	13.0695	3.368	-1.95624
CCDC135	AMPL14596872	0.314	0.081	-1.95477
C2	AMPL4633389	0.42	0.108667	-1.95048
SUSD2	AMPL33444806	1.3645	0.355667	-1.93977
ID3	AMPL11311808	2.348	0.617333	-1.92731
RAB25	AMPL31006624	0.641	0.168667	-1.92615
FLJ31813	AMPL37449859	0.3405	0.091	-1.90372
TNFSF13	AMPL17705953	0.54	0.144667	-1.90023
ATP8B4	AMPL14136232	1.113	0.299667	-1.89302
APOBR	AMPL33891384	16.221	4.41667	-1.87683
TMF1	AMPL12071932	5.604	1.52667	-1.87607
FAM46D	AMPL9375975	0.627	0.172	-1.86606
C3	AMPL5507295	12.9365	3.56167	-1.86082
HFE	AMPL3094287	2.6885	0.749667	-1.84248
RRP7A	AMPL32074985	0.265	0.074	-1.8404
CSF2RB	AMPL2364212	1.932	0.54	-1.83906
SLC4A3	AMPL28326954	4.19	1.174	-1.83552
SEMA6A	AMPL36355127	0.366	0.102667	-1.83388
C11orf21	AMPL4054645	6.23	1.75567	-1.82721
FAM90A1	AMPL32651806	0.4645	0.131	-1.82611
PLD1	AMPL10977830	3.031	0.856667	-1.82299
FBXO2	AMPL13644310	1.3125	0.373333	-1.81378
LGMN	AMPL29560954	16.0765	4.593	-1.80744
ZNF563	AMPL34450237	1.188	0.342333	-1.79506
NEIL1	AMPL13916105	2.9015	0.836333	-1.79465
C19orf35	AMPL22334960	0.451	0.13	-1.79462
RINL	AMPL7278283	5.633	1.62867	-1.79021
RAB20	AMPL33584153	11.054	3.199	-1.78888
C1orf98	AMPL37637696	0.314	0.091	-1.78683
U2AF1L4	AMPL36562618	1.3955	0.405	-1.78479
COL14A1	AMPL36804452	1.786	0.518333	-1.78478
CCDC64B	AMPL4909914	0.5795	0.168333	-1.78349
ADRB1	AMPL3776117	0.498	0.144667	-1.78341
RAB34	AMPL4333604	1.064	0.309667	-1.78071
ACSL5	AMPL33055158	2.8285	0.824	-1.77932
MYL6B	AMPL11273152	3.992	1.166	-1.77554
PLAU	AMPL9700188	16.5275	4.82833	-1.77527
DHX58	AMPL36719848	1.4395	0.422	-1.77025
VSIG10	AMPL34175910	2.21	0.651333	-1.76258
KRT14	AMPL1709242	0.2745	0.081	-1.76081
PRDX1	AMPL10930666	0.883	0.260667	-1.76021
OR52H1	AMPL2333997	0.878	0.261	-1.75017
PPP1R27	AMPL924867	0.857	0.257	-1.73753
DDIT4	AMPL31176656	1872.68	561.832	-1.73689
CARD9	AMPL15885182	13.8405	4.178	-1.72801
RPL3L	AMPL29692017	0.1855	0.056	-1.72792
SPHAR	AMPL13154008	3.886	1.17333	-1.72767
GNN	AMPL19092039	0.3005	0.091	-1.72343
RGS14	AMPL29483368	12.382	3.75633	-1.72085
FLVCR2	AMPL30777991	0.5215	0.158333	-1.7197
OR6V1	AMPL6276172	0.265	0.0806667	-1.71595
NPM1	AMPL8187368	3412.07	1041.48	-1.71201
NDUFC2	AMPL9922517	0.819	0.25	-1.71194
MAN2B1	AMPL6156391	1.047	0.320333	-1.70862
FBLN2	AMPL1248993	0.2745	0.084	-1.70834
GAGE12H	AMPL6137849	2.897	0.886667	-1.7081
ZFHX3	AMPL12522636	6.506	2.007	-1.69673
NADK	AMPL6912140	0.6715	0.207333	-1.69544
GPR132	AMPL12258225	2.3805	0.737667	-1.69022
CEBPE	AMPL9997311	0.3845	0.119333	-1.68799
TBX20	AMPL3173351	0.77	0.239	-1.68785
AQP7	AMPL6815843	0.963	0.299667	-1.68418
GBGT1	AMPL35639565	21.089	6.59367	-1.67734
LAMB1	AMPL8713305	14.7165	4.60133	-1.67731
ZNF497	AMPL21676619	0.2915	0.0913333	-1.67428
GPR52	AMPL29019343	6.4365	2.02167	-1.67073
CERS1	AMPL22174511	1.559	0.49	-1.66977
ZNF100	AMPL18407109	6.514	2.04767	-1.66956
ICAM3	AMPL9446877	0.1455	0.046	-1.66131
CYGB	AMPL18615517	0.3755	0.119	-1.65785
CD37	AMPL9288315	40.9545	13.011	-1.65429
FGD1	AMPL29028330	0.3405	0.109	-1.64333
ARHGAP9	AMPL14147499	9.9075	3.198	-1.63135
LOXL3	AMPL17668420	2.275	0.735667	-1.62874
ZNF91	AMPL7553568	0.371	0.12	-1.62838
WDR45	AMPL99753	8.0555	2.607	-1.62758
IGSF10	AMPL15702561	4.188	1.35567	-1.62726
SPI1	AMPL4939369	69.1855	22.4057	-1.62661
DDX12P	AMPL37904088	0.4785	0.155333	-1.62315
TMEM65	AMPL21485865	21.5315	7.00267	-1.62047
TEX26-AS1	AMPL37451277	0.1945	0.0633333	-1.61873
CUZD1	AMPL35767761	0.765	0.249333	-1.61738
EVI2B	AMPL30005625	4.673	1.52733	-1.61333
KCNN4	AMPL10682162	29.56	9.71033	-1.60605
BTBD6	AMPL17273422	0.5795	0.190667	-1.60376
LOC339894	AMPL38111404	0.575	0.189333	-1.60263
SETD7	AMPL15321255	18.128	5.974	-1.60145
SNORA19	AMPL20965437	3.39	1.11733	-1.60123
EFNB2	AMPL30285103	0.779	0.257	-1.59985
CLIC3	AMPL29369956	0.8845	0.292333	-1.59725
PNCK	AMPL1500642	10.5135	3.48733	-1.59205
NFATC4	AMPL6057390	7.907	2.62433	-1.59118
INHBE	AMPL14454337	19.4515	6.45733	-1.59087
FEZ1	AMPL28116699	26.032	8.65467	-1.58874
PRSS57	AMPL22417236	4.5815	1.52333	-1.58859
THEMIS2	AMPL4441293	16.4195	5.46	-1.58844
TRIM73	AMPL22020992	0.3265	0.108667	-1.58717
CEACAM18	AMPL3025363	0.549	0.183333	-1.58234
NCF4	AMPL3210300	1.421	0.476	-1.57787
TBXAS1	AMPL4982682	1.015	0.340667	-1.57505
CTSL2	AMPL8502736	3.523	1.184	-1.57314
RASGRP4	AMPL16043075	24.2115	8.14767	-1.57123
PTGS2	AMPL4233520	0.5735	0.193333	-1.5687
DACH1	AMPL18134732	3.9005	1.31533	-1.56823
SYTL1	AMPL8573465	15.421	5.225	-1.56139
LIPE	AMPL29581640	0.455	0.154333	-1.55982
ANKRD37	AMPL22049464	22.816	7.75967	-1.55598
HCLS1	AMPL29786636	62.618	21.2967	-1.55595
FAM18A	AMPL2630873	0.1855	0.0633333	-1.55038
SLC26A10	AMPL18616796	2.3665	0.808	-1.55033
C16orf11	AMPL34977336	0.791	0.270333	-1.54894
H19	AMPL21028256	99.2765	33.973	-1.54706
FCRLA	AMPL8259362	0.843	0.289	-1.54446
ANKRD20A1	AMPL15568133	1.427	0.490667	-1.54017
PLXND1	AMPL24451501	21.2585	7.311	-1.5399
CD3G	AMPL3788789	2.134	0.736	-1.53578
SLC26A1	AMPL37388799	2.286	0.791	-1.53108
LRRC37A6P	AMPL20338939	2.076	0.719667	-1.52841
EMILIN2	AMPL14395363	2.95	1.025	-1.52509
OR9Q1	AMPL250403	0.354	0.123	-1.52509
PCDHB9	AMPL31085615	0.6055	0.211667	-1.51633
PLLP	AMPL33903430	1.941	0.678667	-1.51603
FAM71A	AMPL17818250	0.282	0.0986667	-1.51506
IRF5	AMPL2154185	0.2115	0.074	-1.51506
SPACA4	AMPL18674800	0.1505	0.0526667	-1.5148
ARHGAP4	AMPL11720513	35.8345	12.5567	-1.5129
HIVEP2	AMPL13264618	1.197	0.419667	-1.51211
CCDC67	AMPL18061267	0.2605	0.0913333	-1.51207
SEMA4A	AMPL7286866	8.5795	3.01067	-1.51081
CSF3R	AMPL2556788	5.952	2.09067	-1.50941
LOC643201	AMPL37852713	18.702	6.59033	-1.50477
NONO	AMPL6013878	78.585	27.7403	-1.50227
HECW2	AMPL30743376	1.076	0.38	-1.50161

## Sheet: Upregulated genes
Upregulated genes
Gene	Target	Sh Scramble Mean	Sh NPM Mean	Fold change
PRDM9	AMPL31019451	0.0705	3.231	5.51821
LOC442028	AMPL38212365	0.04	1.71233	5.41982
PAK6	AMPL6088705	0.04	1.63667	5.35462
EVC	AMPL17805455	0.31	12.0317	5.27842
ANO5	AMPL21795165	0.115	4.15767	5.17607
RNF17	AMPL14613007	0.115	3.97833	5.11246
DCAF4L2	AMPL34180874	0.2865	9.72433	5.08499
RAET1L	AMPL17324571	0.04	1.252	4.96809
CYFIP2	AMPL1731933	0.0705	2.15667	4.93504
HIST1H2BA	AMPL17413734	0.115	3.293	4.8397
APLNR	AMPL28898163	0.035	1.002	4.83938
MYLK	AMPL17806961	0.075	2.04967	4.77235
GJA4	AMPL11563709	0.115	2.99333	4.70205
EPB42	AMPL3004285	0.04	1.033	4.6907
SRGN	AMPL7471702	3.601	86.029	4.57835
DUOX1	AMPL16607408	0.035	0.821333	4.55254
B4GALT6	AMPL27891146	0.0705	1.47267	4.38466
SOD3	AMPL11642112	0.6315	13.1367	4.37867
LOC648809	AMPL37992780	0.1105	2.27033	4.36079
TWIST1	AMPL4491197	0.035	0.682667	4.28575
LOC643401	AMPL37510932	0.4295	8.14567	4.2453
CMTM8	AMPL15893378	0.0705	1.32933	4.23694
WWC1	AMPL9571431	0.04	0.719667	4.16926
HAS1	AMPL11601394	0.035	0.626667	4.16227
ZFHX4	AMPL14007565	0.035	0.587333	4.06875
SLC30A4	AMPL12818857	0.19	3.17433	4.06238
ITGA3	AMPL29983563	0.035	0.536	3.93681
MDGA1	AMPL17812060	0.115	1.75933	3.93532
MAPT	AMPL1804066	0.035	0.532	3.926
ARHGAP28	AMPL520314	0.2115	3.19167	3.91558
ULBP2	AMPL14294601	0.451	6.759	3.90561
MAGEB1	AMPL15722591	0.08	1.171	3.8716
RAMP1	AMPL27453808	0.141	2.05533	3.86561
CECR2	AMPL13934207	0.9015	12.708	3.81727
SYNE2	AMPL22089242	0.6315	8.678	3.78051
VEPH1	AMPL6961070	0.075	1.016	3.75987
OR2A9P	AMPL20141165	0.08	1.06133	3.72973
ENAH	AMPL342187	1.42	18.449	3.69958
GABRG1	AMPL17784532	0.0705	0.907333	3.68594
UNC13A	AMPL3307849	0.4415	5.65733	3.67964
JAG1	AMPL1544343	0.035	0.426	3.60543
EVC2	AMPL34191557	0.7065	8.446	3.57951
GABBR2	AMPL26838607	0.5165	6.14567	3.57273
ABCA8	AMPL13251723	0.357	4.142	3.53633
SCN8A	AMPL26102172	0.115	1.33367	3.53569
EPS8	AMPL28653489	0.04	0.463667	3.53502
CATSPERB	AMPL15168386	0.225	2.56733	3.51227
ZNF876P	AMPL19454637	0.141	1.59867	3.5031
TSPAN6	AMPL8790872	0.035	0.394	3.49277
PRR9	AMPL9174956	0.2465	2.67333	3.43898
TFF1	AMPL10291500	0.04	0.433	3.4363
TSPYL6	AMPL6208211	1.375	14.7747	3.42562
GUCY2D	AMPL6497311	0.035	0.373	3.41375
ZNF345	AMPL10226175	0.08	0.849333	3.40826
TP53I11	AMPL26935114	0.2955	3.10367	3.39274
CD226	AMPL13383841	0.4295	4.50467	3.39069
PI15	AMPL33672356	0.1195	1.247	3.38338
ABTB2	AMPL34779187	0.1945	2.00433	3.36528
RBMS1	AMPL33730885	0.843	8.67233	3.36282
SLC24A2	AMPL31156039	0.331	3.35933	3.34327
ATP8A1	AMPL28863431	0.075	0.756333	3.33406
LOC646214	AMPL19415064	0.1545	1.52067	3.29903
ERVFRD-1	AMPL21503197	0.04	0.378333	3.24159
TPD52	AMPL684126	0.871	8.20433	3.23564
CDH12	AMPL27957153	0.3355	3.06933	3.19354
SSX3	AMPL18940285	0.31	2.834	3.1925
SVIL	AMPL35207621	0.035	0.314333	3.16687
SEMA3E	AMPL12266477	0.04	0.359	3.16591
LRRTM1	AMPL17664943	0.035	0.303	3.11389
PAGE2	AMPL21955732	0.04	0.341333	3.09311
YAP1	AMPL5626228	0.08	0.679667	3.08676
LIPA	AMPL6231800	0.265	2.226	3.07039
NKX2-2	AMPL10863119	0.397	3.315	3.0618
GNAL	AMPL21536897	0.075	0.622667	3.0535
SSX1	AMPL29002203	0.4015	3.31933	3.04742
FCGR2B	AMPL28300060	0.075	0.619333	3.04575
ZDHHC23	AMPL16317364	0.5	4.102	3.03633
LOC100129269	AMPL38105487	0.256	2.09067	3.02975
STOX1	AMPL4138276	0.035	0.285	3.02554
TIMP2	AMPL11744323	0.04	0.324667	3.02089
MAGEA4	AMPL906709	0.035	0.282	3.01027
PLCB1	AMPL24695389	0.225	1.802	3.0016
CMAHP	AMPL19961588	0.216	1.715	2.98911
COL4A5	AMPL17154963	0.46	3.64167	2.98489
PAEP	AMPL10212072	0.2465	1.925	2.9652
TNF	AMPL5817290	0.04	0.312333	2.96501
OR2A20P	AMPL20139266	0.1195	0.92	2.94462
ASB9	AMPL186587	0.2745	2.107	2.94031
TRIM61	AMPL2569251	0.04	0.306667	2.9386
ZNF331	AMPL31422436	0.08	0.606333	2.92204
TIMP3	AMPL2912361	1.19	9.01133	2.92078
CPA2	AMPL9115074	0.035	0.265	2.92057
PLA2G4E	AMPL8376003	0.035	0.263333	2.91146
B3GNT3	AMPL24577547	0.04	0.299333	2.90368
FAM86B3P	AMPL20806729	0.075	0.561	2.90304
TAC3	AMPL12918721	0.5565	4.15767	2.90132
PTPRN	AMPL11329321	0.495	3.69	2.89812
PCDH9	AMPL21660847	0.5135	3.77733	2.87893
DUOXA1	AMPL35283605	0.1055	0.77	2.86762
FITM1	AMPL21513012	0.075	0.547333	2.86746
LRRC16A	AMPL33831959	0.46	3.35167	2.86517
AGMO	AMPL4169357	0.08	0.582	2.86295
CAMK2N1	AMPL31846641	1.2355	8.95867	2.85819
CCL2	AMPL7440424	0.777	5.61067	2.85219
RECK	AMPL36857087	0.075	0.535667	2.83637
SYTL5	AMPL9254305	2.165	15.3617	2.8269
SH3BGR	AMPL12838025	0.4155	2.92867	2.81732
DCHS2	AMPL31447873	0.1855	1.297	2.80569
DUSP4	AMPL8659594	0.075	0.523	2.80185
FAM154B	AMPL45834	0.225	1.55433	2.7883
GRIN2C	AMPL3011700	0.2515	1.732	2.78381
ZNF569	AMPL34440652	0.2345	1.606	2.77581
PCDHB2	AMPL32506133	0.035	0.239667	2.7756
PCDHB15	AMPL31934394	0.04	0.272	2.76553
FAM46A	AMPL33116636	0.2515	1.701	2.75775
KCNH5	AMPL36502529	0.6175	4.17633	2.75773
LINC00202	AMPL19297011	0.04	0.268333	2.74595
GPC1	AMPL7512421	0.115	0.769667	2.7426
DAB2	AMPL7260755	7.3495	49.0997	2.74
NOP14-AS1	AMPL19857779	0.04	0.264667	2.7261
SPARC	AMPL10760438	19.1335	126.546	2.72549
MYH11	AMPL1319027	0.04	0.264	2.72247
MEIS3	AMPL32029295	0.1945	1.27933	2.71755
LPCAT2	AMPL32314293	1.668	10.7363	2.68631
NDN	AMPL11582929	2.3195	14.8867	2.68213
RHBDL3	AMPL15933203	0.035	0.222667	2.66946
GLB1L3	AMPL3167859	0.035	0.221333	2.66079
SRCIN1	AMPL13940642	0.1195	0.75	2.64988
CASZ1	AMPL2221526	0.04	0.250667	2.6477
SCN9A	AMPL8286693	0.958	5.968	2.63915
GPATCH2	AMPL31572187	0.27	1.672	2.63054
RBPMS2	AMPL22347453	4.5785	28.105	2.61788
ITGB3	AMPL3868029	0.627	3.84633	2.61695
HCG27	AMPL19528685	0.04	0.244333	2.61078
POU6F2	AMPL12505187	0.075	0.457667	2.60933
FGF5	AMPL28387577	0.27	1.64033	2.60296
HCG26	AMPL20076848	0.035	0.211667	2.59637
CDK14	AMPL12049818	0.075	0.446	2.57208
GPR125	AMPL34303862	0.9415	5.55967	2.56197
GNAZ	AMPL9621760	0.359	2.11933	2.56155
MFNG	AMPL7818250	0.2955	1.72067	2.54174
RAB27B	AMPL28082827	0.27	1.571	2.54065
ADAMTS10	AMPL13886090	0.92	5.34633	2.53884
PI16	AMPL15786198	0.19	1.097	2.52949
ZNF844	AMPL2106386	0.314	1.79533	2.51542
ATP1A3	AMPL34488415	0.3405	1.94133	2.51132
ARHGEF16	AMPL25332281	0.4695	2.674	2.5098
MESDC1	AMPL35950726	4.415	25.1047	2.50747
FAM218A	AMPL15693184	0.115	0.644	2.48543
RLN3	AMPL18046638	0.31	1.734	2.48376
SLAIN1	AMPL8331118	0.0705	0.394333	2.48372
OR52I1	AMPL1233447	0.04	0.222667	2.47681
RPL23AP32	AMPL19931488	0.04	0.222	2.47249
C19orf12	AMPL1050970	0.075	0.412667	2.46001
PROKR1	AMPL36418215	0.141	0.775333	2.45912
FAM5C	AMPL21518345	1.9235	10.4877	2.44689
C12orf75	AMPL2868637	0.0705	0.384	2.44541
GNAO1	AMPL35107203	0.115	0.626	2.44453
SESTD1	AMPL18375813	0.4645	2.50433	2.43068
CDC42EP2	AMPL12084121	0.0705	0.373333	2.40477
HOXD4	AMPL24906919	0.04	0.211333	2.40145
CUBN	AMPL2187217	0.075	0.394333	2.39445
GRAMD2	AMPL1815893	0.08	0.419	2.38888
CPAMD8	AMPL33783463	0.035	0.182667	2.38379
BMX	AMPL21514277	0.075	0.387667	2.36985
ST5	AMPL20926015	0.1105	0.57	2.36692
COL21A1	AMPL15047446	0.0705	0.362667	2.36295
FHL2	AMPL11247773	9.273	47.6553	2.36153
SUSD4	AMPL30646596	0.1195	0.613333	2.35966
NOX5	AMPL36595013	0.1855	0.945	2.3489
MAGI1	AMPL2316328	0.5425	2.75233	2.34296
AKAP12	AMPL28324222	0.4155	2.10533	2.34113
RPS27L	AMPL30533622	0.2115	1.06233	2.32851
DUSP6	AMPL8594058	0.1055	0.529333	2.32693
COL6A1	AMPL11574555	0.1105	0.554333	2.32671
LINC00668	AMPL38108463	0.035	0.175333	2.32467
KHDC1L	AMPL3807275	0.1105	0.552667	2.32236
FREM1	AMPL34459171	0.115	0.573333	2.31774
WNK2	AMPL13267032	0.2345	1.16233	2.30936
FAM111A	AMPL36090612	8.626	42.6963	2.30735
HEG1	AMPL30879863	0.1505	0.742	2.30166
PTOV1-AS1	AMPL37475088	0.035	0.172	2.29698
INSR	AMPL6441089	0.4695	2.296	2.28993
KRT79	AMPL15733606	0.0705	0.344333	2.28811
RALGPS1	AMPL25661295	0.04	0.193667	2.2755
PAGE5	AMPL1093031	0.917	4.43433	2.27372
DTX4	AMPL25368900	0.04	0.193333	2.27302
ULK4P2	AMPL18817017	0.04	0.193333	2.27302
LOC100144603	AMPL20196720	0.1505	0.723333	2.2649
BAG5	AMPL2517198	0.0705	0.338333	2.26275
ENPP1	AMPL27542663	0.1195	0.570667	2.25564
MARC2	AMPL30875902	0.1105	0.525	2.24827
C3orf45	AMPL18448869	0.1505	0.714333	2.24683
CD14	AMPL4806194	0.1105	0.524	2.24552
DEPTOR	AMPL35609089	0.075	0.355333	2.24421
VENTX	AMPL26095622	0.866	4.102	2.24389
OR52A1	AMPL13571778	0.035	0.165667	2.24286
TUBA3C	AMPL27439375	1.6415	7.757	2.24048
RAB3B	AMPL8129820	0.2915	1.37633	2.23926
TMEM221	AMPL6693046	0.035	0.165	2.23704
LPAL2	AMPL19570719	0.1505	0.707667	2.23331
LOC441455	AMPL18771443	0.04	0.187333	2.22754
PARP11	AMPL31009084	0.322	1.50667	2.22623
SH3RF1	AMPL37197297	0.04	0.187	2.22497
RAB38	AMPL37271863	0.305	1.42533	2.22442
ENTPD3	AMPL11990836	0.2915	1.35567	2.21743
RAB15	AMPL22071570	0.265	1.229	2.21342
F2RL2	AMPL30107765	0.075	0.347667	2.21274
TRAM1L1	AMPL34317310	0.08	0.370667	2.21205
SDR42E1	AMPL34614211	0.115	0.532667	2.2116
SLCO2B1	AMPL13245796	1.4485	6.65433	2.19973
ZNF461	AMPL17255651	0.08	0.367	2.19771
COL6A2	AMPL7371602	0.331	1.517	2.19632
SSPO	AMPL20581868	0.1505	0.689333	2.19544
PCDHGB8P	AMPL21840553	0.075	0.343333	2.19465
VGF	AMPL10577098	3.9665	18.1257	2.1921
SPRR2D	AMPL13257774	2.0465	9.263	2.17832
KBTBD13	AMPL2126095	0.035	0.158333	2.17754
SCIN	AMPL5049209	0.115	0.517	2.16853
DENND3	AMPL24213615	0.2955	1.327	2.16694
SHANK1	AMPL33057276	0.345	1.54567	2.16356
GAL3ST1	AMPL29711446	0.075	0.334	2.15489
CACNA1H	AMPL35326025	0.216	0.960333	2.1525
GEM	AMPL28640741	0.035	0.155333	2.14994
B3GNT6	AMPL34329418	0.1195	0.530333	2.14989
PTHLH	AMPL21471347	0.1855	0.822667	2.14889
SH3GL3	AMPL10775202	10.0575	44.543	2.14693
CACFD1	AMPL6722371	0.2515	1.11	2.14193
ATP1B1	AMPL10017631	1.7355	7.655	2.14105
ETV2	AMPL24169096	0.04	0.176333	2.14023
LRRC37A4P	AMPL21220277	0.08	0.352	2.1375
RGS9	AMPL28464942	0.04	0.175667	2.13477
DIRAS3	AMPL27553848	0.331	1.44433	2.1255
LRRC4B	AMPL4261422	1.5545	6.71733	2.11144
GPR62	AMPL17527437	0.075	0.324	2.11103
IFT27	AMPL9506383	0.176	0.754333	2.09963
SSH3	AMPL33700101	0.075	0.320667	2.09611
PRAP1	AMPL1664039	0.075	0.320667	2.09611
PPAPDC1B	AMPL1363884	0.1195	0.509333	2.0916
SGK223	AMPL3621860	0.314	1.33767	2.09088
EDARADD	AMPL35609365	1.4915	6.29367	2.07714
LOC100133669	AMPL19131621	0.035	0.147333	2.07366
NKD1	AMPL16515748	0.1105	0.462667	2.06593
GABRQ	AMPL31203006	0.826	3.45367	2.06392
ACTC1	AMPL29562124	0.2915	1.218	2.06295
MAP7	AMPL7036532	18.009	75.1663	2.06137
MORC4	AMPL14432780	0.1195	0.494333	2.04847
TESPA1	AMPL5908127	1.5055	6.171	2.03526
WTH3DI	AMPL5188871	0.0705	0.288667	2.03371
COL15A1	AMPL11461602	1.378	5.64133	2.03346
ACVR2B-AS1	AMPL18939444	0.08	0.324667	2.02089
KIAA1024	AMPL25110802	0.225	0.913	2.02069
IFITM4P	AMPL19969812	0.265	1.073	2.01759
LINC00052	AMPL18868114	0.1195	0.482667	2.01402
PDE11A	AMPL33382739	0.624	2.51433	2.01056
PLEKHB1	AMPL2962276	0.265	1.06633	2.00859
UBTD2	AMPL34546010	0.742	2.97733	2.00453
CXorf48	AMPL2106840	27.1545	108.949	2.00439
FAM134B	AMPL4044240	0.2345	0.940333	2.00358
COMMD7	AMPL16475641	3.401	13.607	2.00032
METTL7B	AMPL35330286	0.3265	1.30233	1.99594
PLEKHG3	AMPL33918209	0.411	1.63733	1.99414
TNFAIP8L2	AMPL35582984	0.544	2.16467	1.99247
AKR1C3	AMPL11374661	0.6715	2.659	1.98542
GLTPD2	AMPL2519348	0.1105	0.436667	1.98249
FAM92A1	AMPL34192444	0.963	3.80333	1.98166
CDH26	AMPL18073475	0.1105	0.432667	1.96921
AKT3	AMPL27377045	0.5255	2.05	1.96386
H2AFB1	AMPL312668	0.0705	0.275	1.96374
MIR22HG	AMPL18936376	0.2865	1.11733	1.96345
SLC44A1	AMPL16469607	0.4415	1.721	1.96276
IL21R	AMPL36798736	0.406	1.58133	1.96159
ZFP30	AMPL25133836	0.8125	3.16433	1.96146
EPB41L3	AMPL13111774	3.767	14.4727	1.94184
FAM127C	AMPL1118810	0.115	0.441	1.93914
ESAM	AMPL34629193	0.3805	1.458	1.93802
OVGP1	AMPL8717191	0.455	1.743	1.93763
CABLES1	AMPL2348373	0.1945	0.745	1.93747
FAM228B	AMPL3556560	0.2395	0.915667	1.9348
OR2AT4	AMPL846028	1.9485	7.43333	1.93165
TFPI2	AMPL13152916	0.115	0.436	1.92269
IFI16	AMPL26956858	2.226	8.42867	1.92085
SLC6A16	AMPL24584673	0.1195	0.451667	1.91825
AFAP1L1	AMPL34860758	0.075	0.283333	1.91754
CALB1	AMPL29349445	9.7765	36.8913	1.91589
LOC100128252	AMPL38163575	0.181	0.680667	1.91096
DUOX2	AMPL24343638	0.265	0.996333	1.91064
ATP6V0E2-AS1	AMPL19373984	0.0705	0.263667	1.90302
MYO3B	AMPL35958113	13.2565	49.512	1.90108
SPATA22	AMPL9998023	0.2745	1.01967	1.89322
MEIS3P1	AMPL19829099	0.181	0.668667	1.8853
TC2N	AMPL35149960	4.65	17.164	1.88408
CAPN5	AMPL29188764	0.455	1.66833	1.87447
C19orf77	AMPL6304729	0.544	1.98867	1.87012
LIPT1	AMPL36158500	0.4325	1.581	1.87007
ULBP3	AMPL35587085	0.08	0.292333	1.86954
LOC728431	AMPL37587766	0.371	1.353	1.86667
NYAP1	AMPL16419610	0.115	0.419	1.86532
PPFIBP2	AMPL8204325	0.641	2.324	1.85821
PMEPA1	AMPL33776471	0.115	0.416667	1.85726
LGI4	AMPL34216070	0.035	0.126667	1.85561
METTL22	AMPL37100456	0.1505	0.541333	1.84675
LGR6	AMPL2899414	0.1055	0.379	1.84495
CYP2E1	AMPL2549655	0.075	0.269333	1.84443
PDE2A	AMPL7489903	1.4335	5.128	1.83885
HIST1H4L	AMPL8929509	0.115	0.411333	1.83867
AGAP2	AMPL3157590	0.1055	0.376667	1.83605
BTBD3	AMPL24391346	4.1325	14.6883	1.82958
UBASH3B	AMPL16229993	0.115	0.408667	1.82929
C9orf174	AMPL35142072	0.1545	0.548333	1.82745
IL9R	AMPL8902477	0.6455	2.28633	1.82455
ZBTB22	AMPL4181292	0.1105	0.390333	1.82066
UBE2E2	AMPL34719295	0.7235	2.55533	1.82045
PRSS53	AMPL2086487	0.115	0.404667	1.8151
ZNF93	AMPL15202302	0.359	1.26233	1.81404
CELF5	AMPL35765835	0.1105	0.387333	1.80953
LOC100131691	AMPL19590919	0.115	0.403	1.80915
TINAGL1	AMPL36900745	1.0655	3.73167	1.80829
ACTL9	AMPL17671288	0.975	3.40733	1.80517
GPLD1	AMPL7411286	0.305	1.06333	1.80171
PLAT	AMPL6551540	1.442	5.025	1.80105
HTR1D	AMPL4926700	0.075	0.261	1.79909
C11orf94	AMPL4686148	0.1195	0.415333	1.79726
CPNE5	AMPL35229370	0.1105	0.384	1.79706
RCAN3	AMPL24752067	1.1315	3.92933	1.79605
DLGAP3	AMPL1656469	0.1545	0.533667	1.78833
PTPN14	AMPL27613858	0.141	0.486667	1.78724
EPHB6	AMPL28910851	44.1095	151.934	1.78428
ARHGAP30	AMPL101118	0.04	0.137667	1.78311
ZAP70	AMPL3819639	0.1105	0.38	1.78195
OR2A42	AMPL845317	0.04	0.137	1.7761
JAM3	AMPL15818823	0.2915	0.998333	1.77603
FCER1G	AMPL27953603	0.2955	1.01033	1.7736
HBEGF	AMPL9095612	1.2465	4.259	1.77263
AMIGO2	AMPL22412584	4.756	16.2493	1.77256
ZNF43	AMPL7395625	0.19	0.647667	1.76925
BCL11A	AMPL36060596	0.2605	0.887	1.76765
OR52A5	AMPL939589	0.115	0.389667	1.76061
CRYBA2	AMPL16591806	0.406	1.37067	1.75533
CCR4	AMPL27144500	0.075	0.251333	1.74464
GCNT2	AMPL35395105	0.627	2.101	1.74454
LRRC16B	AMPL16434711	0.1055	0.353333	1.74379
CCDC68	AMPL14360574	0.958	3.20467	1.74208
TBC1D16	AMPL31837693	0.31	1.03533	1.73976
ZNF607	AMPL16424139	0.737	2.45967	1.73873
GFRA3	AMPL11799536	0.115	0.383667	1.73822
FAM167A	AMPL16089493	0.1595	0.531	1.73516
ZAR1	AMPL17486228	0.742	2.46967	1.73483
APOD	AMPL7397388	0.4365	1.452	1.73399
NNMT	AMPL29937114	1.2355	4.09133	1.72748
CDKN1A	AMPL18336733	8.7345	28.8047	1.72151
MT1X	AMPL29200757	6.8265	22.4917	1.72017
C14orf37	AMPL3855528	0.1855	0.609333	1.71581
OR2AG2	AMPL757310	0.596	1.95767	1.71575
LNX1	AMPL4557730	1.51	4.957	1.71492
PROX1	AMPL8679221	1.5025	4.93233	1.71491
OR2Z1	AMPL69267	0.7065	2.29533	1.69994
C19orf38	AMPL4817753	0.141	0.457667	1.6986
FAM59A	AMPL8823015	0.1195	0.383667	1.68284
DNAJC15	AMPL13789562	1.918	6.14033	1.67871
CPXM1	AMPL33557432	0.2955	0.945667	1.67817
TMEM108	AMPL5270492	0.265	0.847667	1.6775
GIMAP2	AMPL33790262	0.2115	0.675667	1.67565
WDR52	AMPL11041651	0.1455	0.464333	1.67414
SIGLEC9	AMPL26258642	0.225	0.715333	1.66869
SLC6A19	AMPL5380156	1.294	4.08733	1.65932
ZNF502	AMPL2744179	0.1105	0.346333	1.64811
IGSF11	AMPL894381	0.397	1.24367	1.64739
C3orf80	AMPL6870392	0.181	0.567	1.64736
GPAT2	AMPL22483620	0.08	0.25	1.64386
CARD11	AMPL15351043	6.687	20.885	1.64304
ADRB2	AMPL17586	0.636	1.98333	1.64083
PABPN1L	AMPL1799263	0.1545	0.481333	1.63943
WFS1	AMPL27789816	0.1105	0.342667	1.63276
CSPG4	AMPL10520067	0.1545	0.478333	1.63041
NXPH3	AMPL12570590	0.1505	0.465667	1.62953
CCR7	AMPL7903159	0.42	1.297	1.62672
EML6	AMPL1529474	0.1855	0.572333	1.62544
SYT3	AMPL10584263	0.8495	2.61567	1.62249
KIF2A	AMPL2567971	0.1455	0.447667	1.62141
GPRASP2	AMPL1244239	0.08	0.246	1.62059
UPK1B	AMPL12404256	0.3755	1.154	1.61976
STEAP2	AMPL16567668	0.2605	0.791	1.60239
WIPI1	AMPL30888171	4.788	14.4857	1.59713
LOC344595	AMPL19748804	0.636	1.92333	1.59651
EGR3	AMPL30408915	0.7635	2.29867	1.5901
LOC100506804	AMPL37635827	0.512	1.54067	1.58934
CHD5	AMPL30954144	0.04	0.12	1.58496
SH3TC1	AMPL32050082	1.421	4.26067	1.58417
MYLK2	AMPL18707035	0.04	0.119333	1.57693
RASAL2	AMPL16253483	0.305	0.909	1.57547
TRIM15	AMPL16861680	0.279	0.831	1.57458
PTGES	AMPL28136630	0.141	0.419	1.57126
LPAR5	AMPL6033001	0.115	0.341333	1.56955
GOLGA8I	AMPL19848225	0.075	0.222	1.5656
PPL	AMPL10972104	0.1505	0.444667	1.56296
NKPD1	AMPL20673009	0.075	0.221	1.55908
EN1	AMPL11922641	0.2915	0.857333	1.55636
LINC00622	AMPL38158798	0.1545	0.454333	1.55614
BZRAP1	AMPL28260999	1.9205	5.64533	1.55558
KHDRBS3	AMPL12480940	0.8095	2.37867	1.55505
LOC100499484	AMPL37925577	0.27	0.788	1.54524
TCL6	AMPL19447216	0.035	0.102	1.54314
SLC35F3	AMPL18016986	0.1455	0.423333	1.54077
ABCG4	AMPL35962683	0.08	0.232667	1.54019
ARSE	AMPL2885948	0.1105	0.321	1.53853
NKD2	AMPL18007898	0.371	1.07767	1.53842
EGR2	AMPL3648658	0.5705	1.656	1.5374
SEPP1	AMPL4514805	12.706	36.8683	1.53687
LCA5L	AMPL34591642	0.1505	0.436667	1.53677
RAET1K	AMPL21087653	0.3755	1.08933	1.53656
OVOL2	AMPL35017297	0.1055	0.306	1.53629
COL23A1	AMPL17617516	0.2865	0.83	1.53458
SPAG1	AMPL16335277	1.662	4.81233	1.53382
SIGLEC14	AMPL4071230	0.2915	0.843	1.53204
ZNF662	AMPL3461151	0.596	1.72267	1.53126
OR1F2P	AMPL20131417	0.1195	0.344333	1.5268
TAS2R41	AMPL16005403	0.7925	2.28167	1.52561
CDH22	AMPL35210989	0.1105	0.318	1.52498
ZFP37	AMPL7747593	0.1105	0.317333	1.52195
MANSC1	AMPL33292016	5.457	15.6023	1.51558
TMEM170B	AMPL4051477	0.716	2.047	1.51548
TLR5	AMPL7261913	0.73	2.083	1.51269
PAGE4	AMPL12516916	0.8095	2.30933	1.51237
NOXO1	AMPL18122125	0.27	0.769667	1.51127
GAS2	AMPL27070177	0.5775	1.646	1.51107
SERPINE1	AMPL3783081	5.722	16.3	1.51028
EXD3	AMPL33818524	0.115	0.326667	1.50619
